# Supplementary material
Source: PubMed Central journal article supplement (PMC3485678)
Supplement: NIHMS414186-supplement-1_si_001.pdf [file NIHMS414186-supplement-1_si_001.pdf]

## Supporting information for:

# Hierarchically-assembled Theranostic Nanostructures for siRNA Delivery and Imaging Applications

Ritu Shrestha,<sup>†,‡</sup> Mahmoud Elsabahy,<sup>†,‡,‡,\*</sup> Hannah Luehmann,<sup>§</sup> Sandani Samarajeewa,<sup>†,‡</sup> Stephanie Florez-Malaver,<sup>†,‡</sup> Nam S. Lee,<sup>†,‡,‡</sup> Michael J. Welch,<sup>§,‡</sup> Yongjian Liu,<sup>§,\*</sup> Karen L. Wooley<sup>†,‡,\*</sup>

<sup>†</sup>Departments of Chemistry and Chemical Engineering, Texas A&M University, P.O. Box 30012, College Station, TX 77842, USA

<sup>‡</sup>Laboratory for Synthetic-Biologic Interactions, Texas A&M University, P.O. Box 30012, College Station, TX 77842, USA

<sup>§</sup>Department of Radiology, Washington University in Saint Louis, MO 63110, USA

<sup>‡</sup>Department of Pharmaceutics, Faculty of Pharmacy, Assiut University, Assiut, Egypt

<sup>‡</sup>Present address: The Dow Chemical Company, Dow Electronic Materials, Marlborough, MA 01752, USA

*KEYWORDS: Hierarchical assemblies, nanoparticles, polymers, imaging, siRNA delivery, diagnostics, radiolabeling*

<sup>‡</sup> This is a dedication for Dr. Michael J. Welch who passed away on May 6<sup>th</sup>, 2012.

Corresponding Authors

[wooley@chem.tamu.edu](mailto:wooley@chem.tamu.edu) (K. L. Wooley), [liuyo@mir.wustl.edu](mailto:liuyo@mir.wustl.edu) (Y. Liu),  
[mahmoud.elsabahy@chem.tamu.edu](mailto:mahmoud.elsabahy@chem.tamu.edu) (M. Elsabahy)

## S1. Preparation of cSCKs

The cSCKs were prepared in a two-step process; firstly amphiphilic block copolymer of PAEA<sub>160</sub>-*b*-PS<sub>30</sub> (5.0 mg) was directly dissolved in nanopure water (5.0 mL) and sonicated using a water bath sonicator for 10 min to obtain clear micellar solution at a concentration of 1 mg/mL. The solution was then allowed to stir overnight at room temperature. To the micellar solution (5.0 mL), sodium carbonate (20  $\mu$ L of 1.0 M solution) was added to adjust the pH to *ca.* 8.0. A diacid crosslinker, 4,15-dioxo-8,11-dioxa-5,14-diazaoctadecane-1,18-dioic acid, (2.0 mg) was activated with HOBT (1.7 mg, 2.2 equiv. *per* COOH) and HBTU (4.8 mg, 2.2 equiv. *per* COOH) in 300  $\mu$ L of DMF for 30 min. The activated crosslinker solution was slowly added to the micellar solution to crosslink *ca.* 5 % of the amines. The reaction mixture was allowed to stir overnight, and then transferred to a dialysis tubing (MWCO *ca.* 6000-8000 Da) and dialyzed against nanopure water for 3 d to obtain clear cSCK solution at 0.88 mg/mL. ( $D_h$ )<sub>number</sub> (DLS) = 21  $\pm$  6 nm; ( $D_h$ )<sub>volume</sub> (DLS) = 48  $\pm$  22 nm; ( $D_h$ )<sub>intensity</sub> (DLS) = 101  $\pm$  59 nm.  $D_{av}$  (TEM) = 15  $\pm$  3 nm. Zeta potential = 35  $\pm$  2 mV (nanopure water, pH 5.5).

## S2. Preparation of SCRs

Anionic cylinders were prepared by aqueous self assembly of amphiphilic block copolymer of PAA<sub>140</sub>-*b*-PpHS<sub>50</sub>, as reported previously.<sup>1</sup> To a 100 mL round bottom flask, equipped with a magnetic stir bar, PAA<sub>140</sub>-*b*-PpHS<sub>50</sub> (25 mg) was added followed by nanopure water (25 mL) to achieve a polymer concentration of 1 mg/mL. The mixture was allowed to stir at room temperature for 2 h followed by addition of nanopure water (60 mL) to achieve a final polymer concentration of *ca.* 0.3 mg/mL. The solution was then allowed to stir at room

temperature. The following day, cylindrical micelles were allowed to undergo crosslinking of approximately 10% of the acrylic acid segments *via* amidation. To a 50 mL round bottom flask equipped with a magnet stir bar, a solution of cylindrical micelles (25 mL) was added. To this solution, a diamine crosslinker 2, 2'-ethylenedioxybis(ethylamine) (1 mg, 1.1 equiv. *per* COOH) was added from a stock solution in nanopure water and the reaction mixture was allowed to stir. After 30 min, 1-ethyl-3-(3-dimethylaminopropyl carbodiimide methiodide) (2.4 mg, 1.3 equiv. *per* COOH) was slowly added over a period of 2 min from a stock solution in nanopure water. The reaction mixture was allowed to stir overnight, and then transferred to a dialysis tubing (MWCO *ca.* 6000-8000 Da) and dialyzed against nanopure water for 3 d to obtain SCR solution at 0.28 mg/mL. Zeta potential =  $-30 \pm 2$  mV (nanopure water, pH 5.5).

### **S3. Preparation of hierarchical assemblies**

Hierarchical assemblies were prepared by mixing cSCKs (600  $\mu$ L) with SCRs (150  $\mu$ L) to achieve an amine: carboxylate (N/C) ratio of 10:1. Zeta potential =  $25 \pm 2$  mV (nanopure water, pH 5.5).

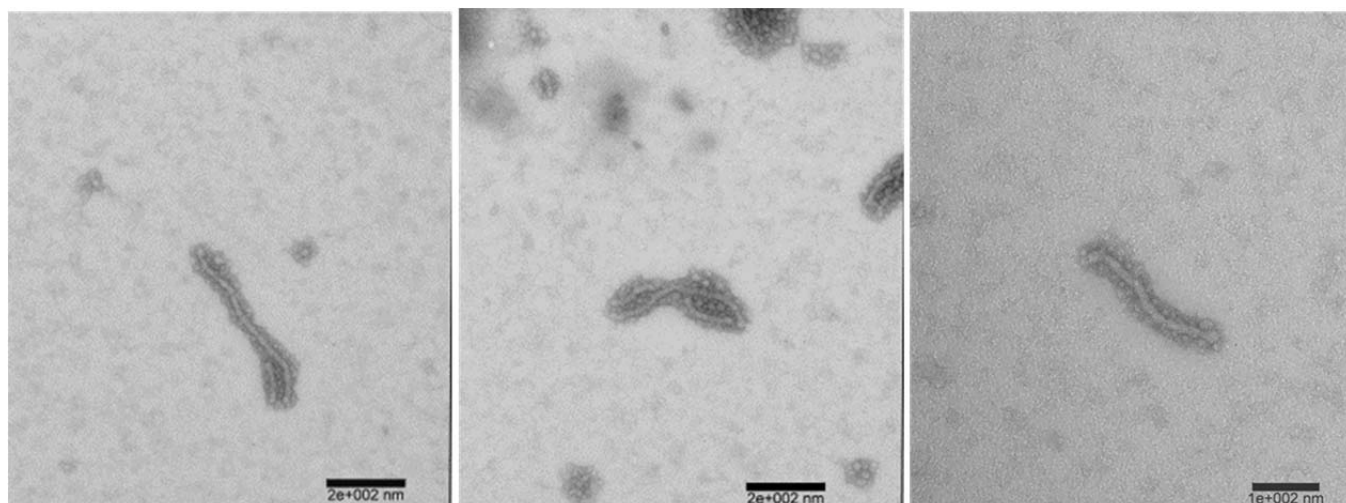

**Figure S1.** TEM micrographs of hierarchically-assembled nanoparticles

#### **S4. Gel shift assays**

Agarose gels (1 wt%) were prepared in Tris-acetate-EDTA buffer (Bio-Rad Laboratories, Inc., Hercules, CA). The siRNA (5'-Cy3-(sense strand)-GGCCACAUCGGAUUUCACU,  $M_w = 13814$  g/mol, Dharmacon, Chicago, IL), either free or complexed to cylinders, Lipofectamine, the cSCKs or the hierarchal assemblies at nitrogen (total amine concentrations of the primary amines in the cSCKs and HAT)-to-phosphate (N/P) ratios ranging from 0.5-to-5 (1  $\mu$ g siRNA/35  $\mu$ L/well), were mixed with glycerol (50% v/v) prior to the electrophoresis. The weight and optimal (as set by the manufacturer) ratios were utilized for the cylindrical nanoparticles and Lipofectamine, respectively. Gel electrophoresis was carried out using a horizontal apparatus at 100 V for 20 min and fluorescence imaging of the separated siRNA bands was performed using a ChemiDoc XRS imager (Bio-Rad Laboratories, Inc.). The analysis and quantitative measurements of the siRNA bands were carried out by using Image Lab software (Bio-Rad Laboratories, Inc.).

## **S5. Laser scanning confocal microscopy (LSCM)**

Human ovarian adenocarcinoma (OVCAR-3,  $1 \times 10^5$  cells/well) cells were plated in glass-bottom six-well plate (MatTek Co., Ashland, MA) in DMEM medium. Cells were incubated at 37 °C in a humidified atmosphere containing 5% CO<sub>2</sub> for 24 h to adhere. Then, the medium was replaced with a fresh media 1-h prior to the addition of siRNA mixed with cylinders, cSCKs, hierarchical assemblies or Lipofectamine (200 nM final concentration of the 5'-Cy3-siRNA). The cells were incubated with the formulations for 3 h and washed extensively with PBS. Then, DRAQ-5 (Biostatus Ltd., Shepshed, Leicestershire, UK) was utilized to stain the nucleus (30 min incubation, followed by extensive washing with PBS). Cells were then fixed with 1% formaldehyde for 20 min, washed once with PBS. The cells were then stored in 1 mL PBS in the refrigerator and analyzed by laser scanning confocal microscopy (LSM 510, Zeiss, Jena, Germany). The images were collected under the same conditions (laser power, detector gain, *etc.*) for consistency, and  $\lambda_{\text{excitation}}$  of 543 and 633 nm were utilized for the Cy3 and DRAQ-5, respectively.

## **S6. Death-siRNA transfection assays**

RAW 264.7 mouse macrophages ( $2 \times 10^4$  cells/well) and OVCAR-3 cells ( $5 \times 10^3$  cells/well) were plated in 96-well plate in DMEM and RPMI-1640 medium (10% and 20% fetal bovine serum, for the RAW 264.7 and OVCAR-3, respectively and 1% penicillin/streptomycin). Cells were incubated at 37 °C in a humidified atmosphere containing 5% CO<sub>2</sub> for 24 h to adhere. Then, the medium was replaced with a fresh medium 1-h prior to the addition of the siRNA mixed with cylinders, Lipofectamine, cSCKs or hierarchical assemblies (100 nM final concentrations of AllStars death- or negative control-siRNA (Qiagen, Valencia, CA)) at N/P

ratio of 5. The cells were incubated with the various formulations for 24 h and washed extensively with PBS and the cell viability was measured 24 h later by measuring the relative cell viability of the cells treated with death-siRNA to the negative control-loaded nanoparticles. The Lipofectamine-siRNA complexes were prepared according to the manufacturer instructions and the transfection efficiency was measured following the same procedures of the siRNA-complexes.

### **S7. Radiolabeling of nanostructures**

Bromine-76 ( $t_{1/2} = 16.2$  h,  $\beta^+ = 57\%$ , EC = 43%) was produced on the Washington University Medical School CS-15 cyclotron by the  $^{76}\text{Se}$  (p,n)  $^{76}\text{Br}$  nuclear reaction.<sup>2</sup> Hierarchically-assembled HAT nanoparticles, cSCKs, and SCRs (20  $\mu\text{g}$ ) were each incubated with 130  $\mu\text{Ci}$   $^{76}\text{Br}$  in 1x PBS buffer with the addition of bromoperoxidase (BPO, 0.6 units) in hydrogen peroxide (2.65 pmol) for 1 h at 0 °C. The radiochemical purity of  $^{76}\text{Br}$ -radiolabeled nanoparticles was monitored by radio instant thin layer chromatography (radio-ITLC, Bioscan, Washington, DC). Additionally, chloramines-T method was also employed for  $^{76}\text{Br}$  radiolabeling following a previously published procedure.<sup>3</sup>

### **References:**

1. Lee, N. S.; Lin, L. Y.; Neumann, W. L.; Freskos, J. N.; Karwa, A.; Shieh, J. J.; Dorshow, R. B.; Wooley, K. L. *Small*, **2011**, 7(14), 1998-2003.
2. Liu, Y.; Ibricevic, A.; Cohen, J. A.; Cohen, J. L.; Gunsten, S. P.; Fréchet, J. M.; Walter, M. J.; Welch, M. J.; Brody, S. L. *Mol. Pharm.* **2009**, 6(6), 1891-1902.

3. Almutairi, A.; Rossin, R.; Shokeen, M.; Hagooly, A.; Ananth, A.; Capoccia, B.; Guillaudeu, S.; Abendschein, D.; Anderson, C. J.; Welch, M. J.; Frechet, J. M. *Proc. Natl. Acad. Sci. U S A* **2009**, *106*(3), 685-690.
